# Supplementary material for: Periodic mesoporous Lix(Mn1/3Ni1/3Co1/3)O2 spinel
Source: Royal Society of Chemistry journal article supplement (doi:10.1039/c005146m), 2010-01-01
Supplement: c005146m.pdf [file c005146m.pdf]

## Supporting Information for Hill *et al.*

# Periodic Mesoporous $\text{Li}_x(\text{Mn}_{1/3}\text{Ni}_{1/3}\text{Co}_{1/3})\text{O}_2$ Spinel

### Experimental Details

Nitrogen adsorption experiments were performed on a Quantachrome Autosorb 1 at -196 °C over the partial pressure range  $0.005 \leq P/P_0 \leq 0.975$ . Prior to analysis, samples were degassed at 200°C and  $5 \times 10^{-3}$  Torr for 24 hours. Parameters including BET surface area, total pore volume, and t-plot micropore analysis were determined using the 'Autosorb 1 for Windows' ver 1.55 Software, © 2001. BdB-BHH pore size distributions were determined following the procedure described by Lukens *et al.*<sup>[1]</sup>

X-ray diffraction was performed on the powder diffraction beamline at the Australian Synchrotron with an incident wavelength of 1.00 Å. Each sample was placed in a 0.3 mm diameter quartz capillary and examined over the range of  $2 < 2\theta < 82$ . Samples were also examined on a Bruker D8 Advance X-ray Diffractometer with  $\text{CuK}\alpha$  radiation (40kV, 40mA) monochromatised with a graphite sample monochromator was employed to determine the X-ray diffraction (XRD) patterns. Each sample was scanned over the 2-theta range 5 to 85° with a step size of 0.02° and a count time of 4 seconds per step. Analyses were performed on the collected XRD data for each sample using the Bruker XRD search match program EVA™. Crystalline phases were identified using the ICDD-JCPDS powder diffraction database. Structure calculations were performed using the freely available Crysfire software.

Transmission Electron Microscopy (TEM). The samples were first dispersed in Milli-Q water and deposited on 200 mesh carbon coated copper grids. Microscopy was then performed on a Philips CM30 Transmission Electron Microscope, operating at an accelerating voltage of 200kV. Selected area electron diffraction was recorded on a JEOL 2100F operated at 200kV. The material was prepared for TEM observation simply by dispersing its powder form in high-purity ethanol and depositing a drop of the suspension onto a copper grid coated with holey-carbon film.

### **Preparation of KIT-6 silica**

This material was prepared according to a previously reported procedure.<sup>[2]</sup> 24.00 g of Pluronic P123 dissolved at 37 °C in a polypropylene flask containing a mixture of 864 mL water and 47.4 mL of 35 % HCl. After complete dissolution 24.00 g of *n*-BuOH was added and the mixture stirred at 37 °C for a further 60 minutes. Subsequently tetraethyl *ortho*-silicate (51.60 g, 0.248 mol) was added and the mixture stirred for a further 20 hours. Stirring was ceased and the mixture was aged at 100 °C for 24 hours. The mixture was filtered while hot, dried under flowing air, washed with a small amount of 10 % HCl-EtOH, dried once more, and then calcined at 550 °C for 6 hours, the temperature was ramped at a rate of 1 °C/min. Yield 14.59 g, 98 %. BET Surface area<sup>a</sup> 823 m<sup>2</sup>g<sup>-1</sup>, total pore volume<sup>b</sup> 1.050 cm<sup>3</sup>g<sup>-1</sup>, micropore volume<sup>c</sup> 0.114 m<sup>2</sup>g<sup>-1</sup>. <sup>a</sup> BET surface area calculated from the nitrogen adsorption isotherm in the range 0.05 ≤ P/Po ≤ 0.30. <sup>b</sup> Calculated from a single point on the BET adsorption isotherm at P/Po=0.95. <sup>c</sup> Calculated

## **Results and Discussion**

### **Structure solution of the metal oxide phase**

Samples were examined using synchrotron radiation to better isolate the peak positions in comparison to that obtained by laboratory means, which delivered extremely broad peaks (see Figure 2 of main article) due to the small crystallite size of the mesoporous material.

Table S1. Calculated and observed peaks assigned to monoclinic lithium manganese nickel cobalt oxide with unit cell parameters  $a= 8.148 \text{ \AA}$   $b= 2.884 \text{ \AA}$   $c= 5.780 \text{ \AA}$ ,  
 $\beta= 90.59^\circ$ ,  $V= 135.83 \text{ \AA}^3$ .

| $hkl$  | $d_{\text{obs}}$ (XRD) | $D_{\text{obs}}$ (SAED) | $d_{\text{calc}}$ |
|--------|------------------------|-------------------------|-------------------|
| 1 0 1  | 4.693                  | 4.68 (2)                | 4.688             |
| 2 0 0  | 2.886                  | 2.86 (2)                | 2.887             |
| 1 0 -3 | 2.467                  | 2.45 (2)                | 2.467             |
| 2 0 -2 | 2.369                  | 2.35 (3)                | 2.367             |
| 2 2 0  | 2.042                  | 2.06 (2)                | 2.041             |
| 2 2 -2 | 1.831                  | 1.81 (3)                | 1.831             |
| 3 2 -1 | 1.574                  | 1.58 (1)                | 1.574             |
| 2 2 -4 | 1.447                  | 1.44 (1)                | 1.447             |

## Elemental analysis

Table S2. Results of ICP analysis.

| Calcination Temperature/°C | Stoichiometric Composition                                                              | Crystal Size/nm | 1 <sup>st</sup> Charge Capacity/mAhg <sup>-1</sup> | 1 <sup>st</sup> Discharge Capacity/mAhg <sup>-1</sup> |
|----------------------------|-----------------------------------------------------------------------------------------|-----------------|----------------------------------------------------|-------------------------------------------------------|
| 500                        | Li <sub>0.33</sub> Mn <sub>0.3</sub> Ni <sub>0.3</sub> Co <sub>0.3</sub> O <sub>2</sub> | 7.21            | 180                                                | 168                                                   |
| 600                        | Li <sub>0.35</sub> Mn <sub>0.3</sub> Ni <sub>0.3</sub> Co <sub>0.3</sub> O <sub>2</sub> | 9.31            | 109                                                | 102                                                   |
| 700                        | Li <sub>0.40</sub> Mn <sub>0.3</sub> Ni <sub>0.3</sub> Co <sub>0.3</sub> O <sub>2</sub> | 9.92            | 80                                                 | 93                                                    |
| 1000                       |                                                                                         | 83.75           |                                                    |                                                       |

Prior to elemental Analysis all samples were digested in HCl/HNO<sub>3</sub> acid mixture with elemental ratios determined by an Inductively Coupled Plasma – Atomic Emission Spectrometer.

## References

1. Lukens, W. W.; Schmidt-Winkel, P.; Zhao, D. Y.; Feng, J. L.; Stucky, G. D., *Langmuir* **1999**, 15(16), 5403.
